# Supplementary material for: The safety and efficacy of immunotherapy with anti-programmed cell death 1 monoclonal antibody for lung cancer complicated with Mycobacterium tuberculosis infection
Source: PubMed Central journal article supplement — Transl Lung Cancer Res. 2021 Oct;10(10):3929–42. doi: 10.21037/tlcr-21-524 (PMC8577979; doi:10.21037/tlcr-21-524), 2021-10
Supplement: tlcr-10-10-3929-dss.pdf [file tlcr-10-10-3929-dss.pdf]

## Data Sharing Statement

|                     |                                                                                                                                                    |                                                                                         |
|---------------------|----------------------------------------------------------------------------------------------------------------------------------------------------|-----------------------------------------------------------------------------------------|
| <b>Article Info</b> | <a href="https://dx.doi.org/10.21037/tlcr-21-524">https://dx.doi.org/10.21037/tlcr-21-524</a>                                                      |                                                                                         |
| <b>Item</b>         | <b>Question</b>                                                                                                                                    | <b>Authors' Response<br/>(place "-" if not applicable)</b>                              |
| 1                   | Would you like to share data collected for your study to others?                                                                                   | We would not like to share data collected for our study to others.                      |
| 2                   | If not, would you like to share the reason for your decision?                                                                                      | Our study is a retrospective analysis and some survival data are still under follow-up. |
| 3                   | What data in particular will be shared?                                                                                                            | -                                                                                       |
| 4                   | Any other documents will be share? Such as study protocol, statistical analysis plan, informed consent form, clinical study report, analytic code. | -                                                                                       |
| 5                   | When will data availability begin?                                                                                                                 | -                                                                                       |
| 6                   | When will data availability end?                                                                                                                   | -                                                                                       |
| 7                   | To whom will you share the data?                                                                                                                   | -                                                                                       |
| 8                   | For what type of analysis or purpose?                                                                                                              | -                                                                                       |
| 9                   | How or where can the data/documents be obtained?                                                                                                   | -                                                                                       |
| 10                  | Any other restrictions?                                                                                                                            | -                                                                                       |
