# Supplementary figures and images for: The safety and efficacy of immunotherapy with anti-programmed cell death 1 monoclonal antibody for lung cancer complicated with Mycobacterium tuberculosis infection
Source: PubMed Central journal article supplement — Transl Lung Cancer Res. 2021 Oct;10(10):3929–42. doi: 10.21037/tlcr-21-524 (PMC8577979; doi:10.21037/tlcr-21-524), 2021-10

Supplementary

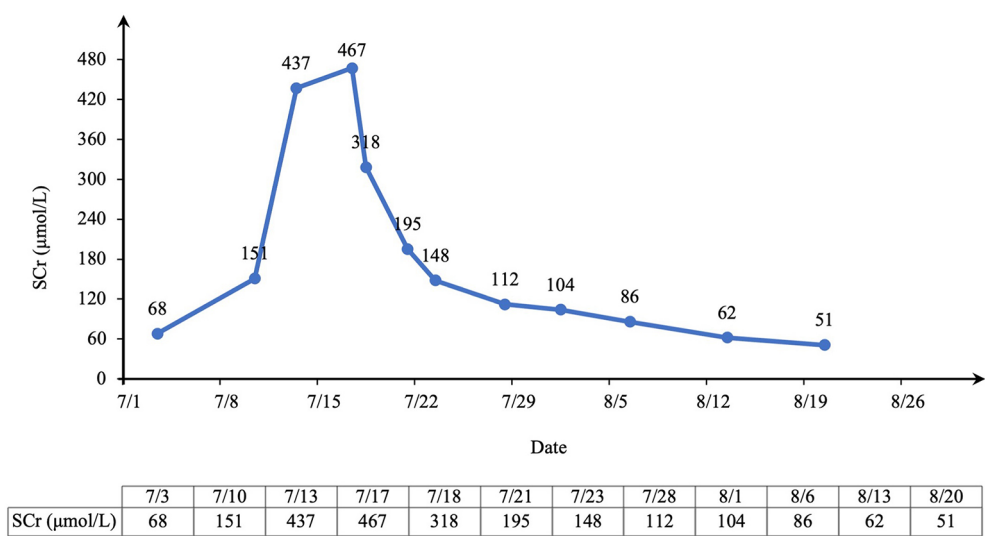

Figure S1 Line chart of serum creatinine over time.

Supplement: tlcr-10-10-3929-supplementary.pdf [file tlcr-10-10-3929-supplementary.pdf]
